# Supplementary material
Source: PubMed Central journal article supplement (PMC9378750)
Supplement: NIHMS1781264-supplement-2.pdf [file NIHMS1781264-supplement-2.pdf]

a

Gtex sun-exposed skin (Dark red module)

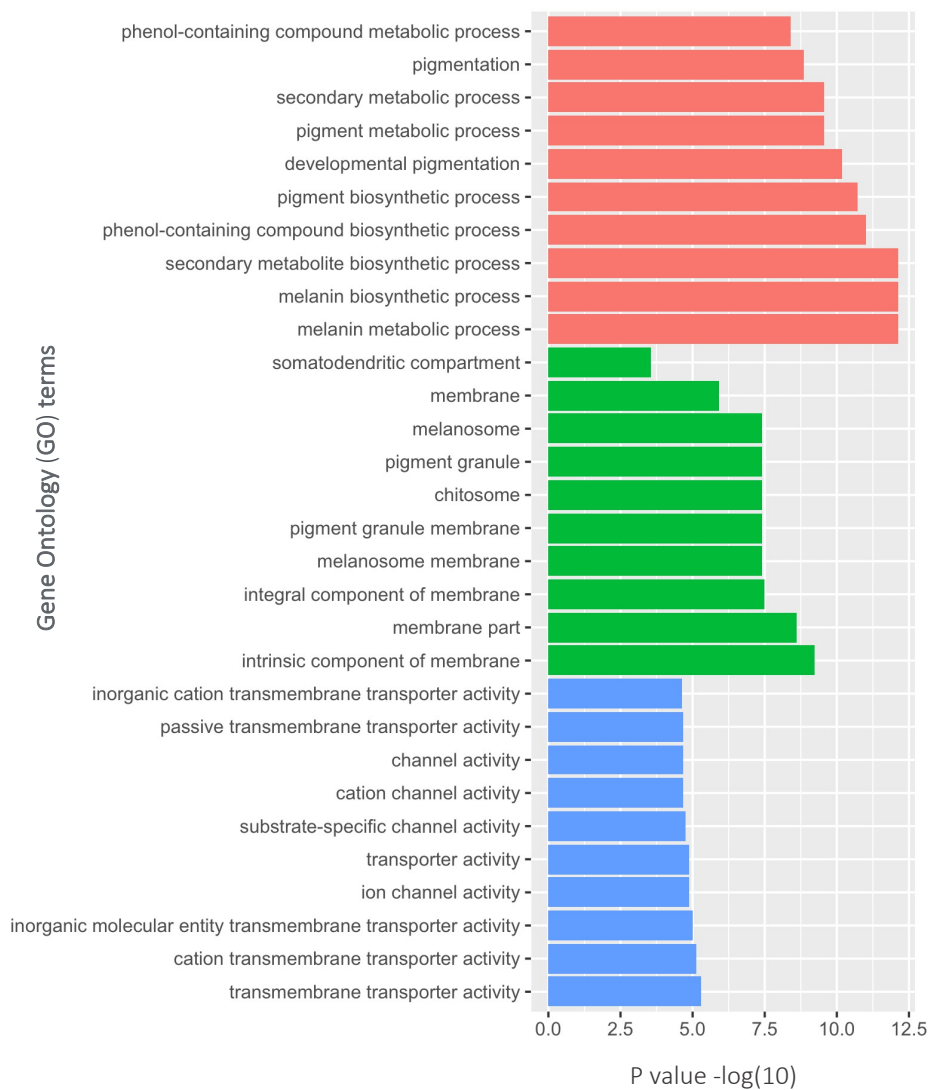

Gtex sun non-exposed skin (Dark red module)

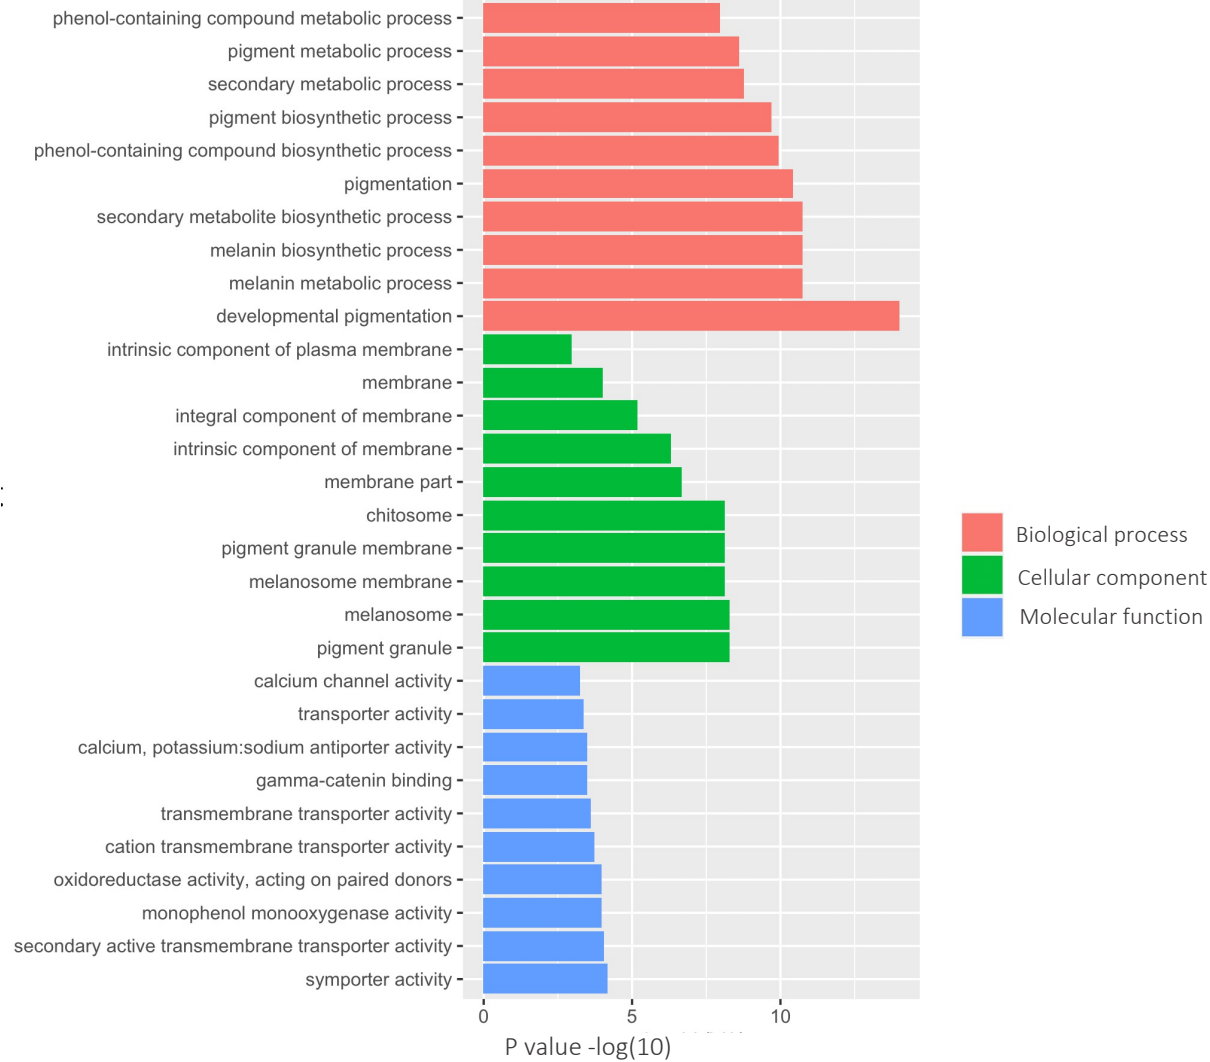

Biological process  
Cellular component  
Molecular function

b

SKCM (Red and Green modules)

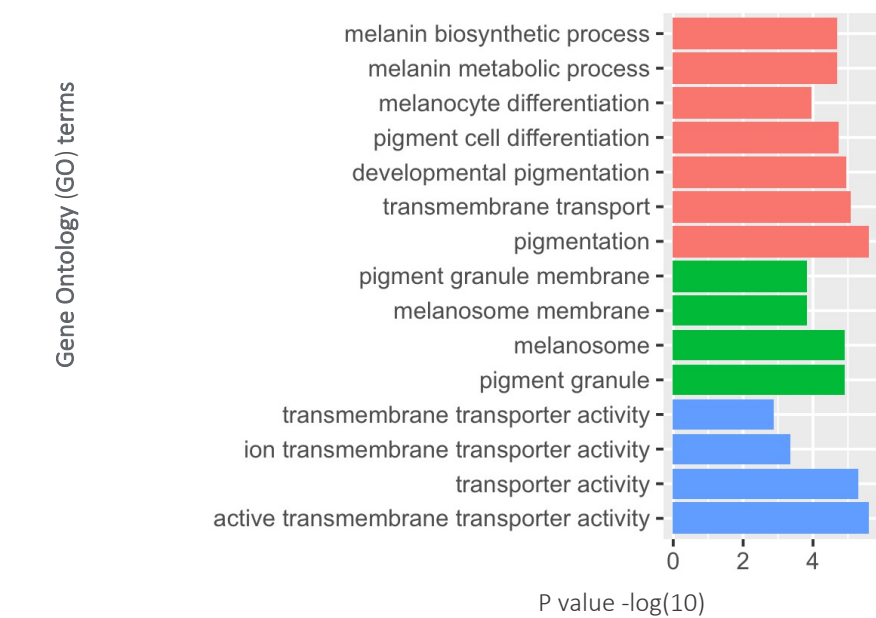

Melanocyte cell line (Brown module)

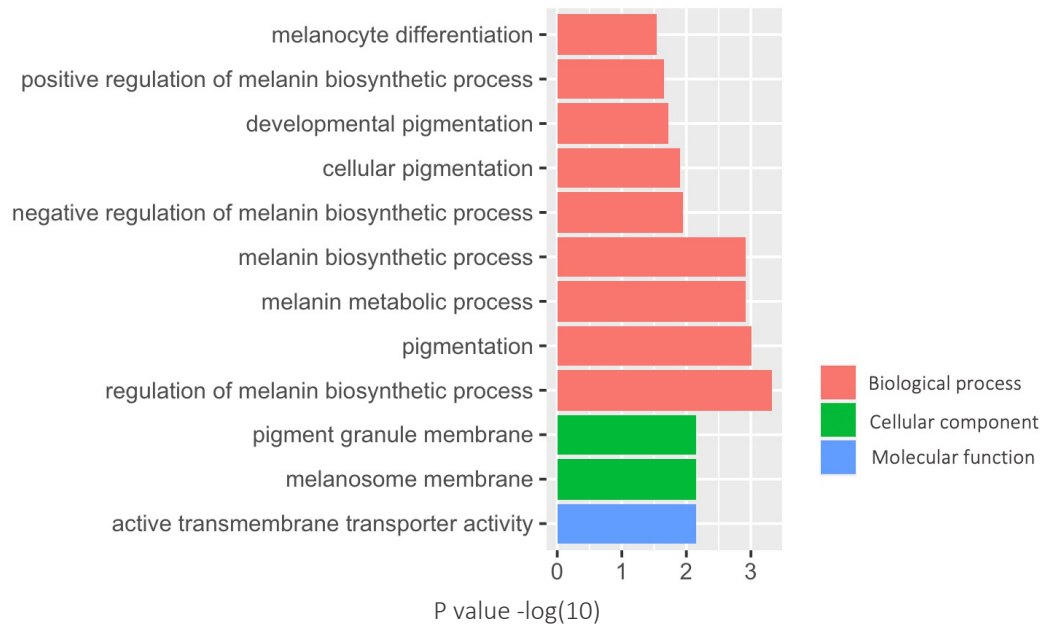

Biological process  
Cellular component  
Molecular function
