# Supplementary material
Source: PubMed Central journal article supplement (PMC9378750)

Dark green module (GTEx)

**cor=0.95, p=7.6e-23**

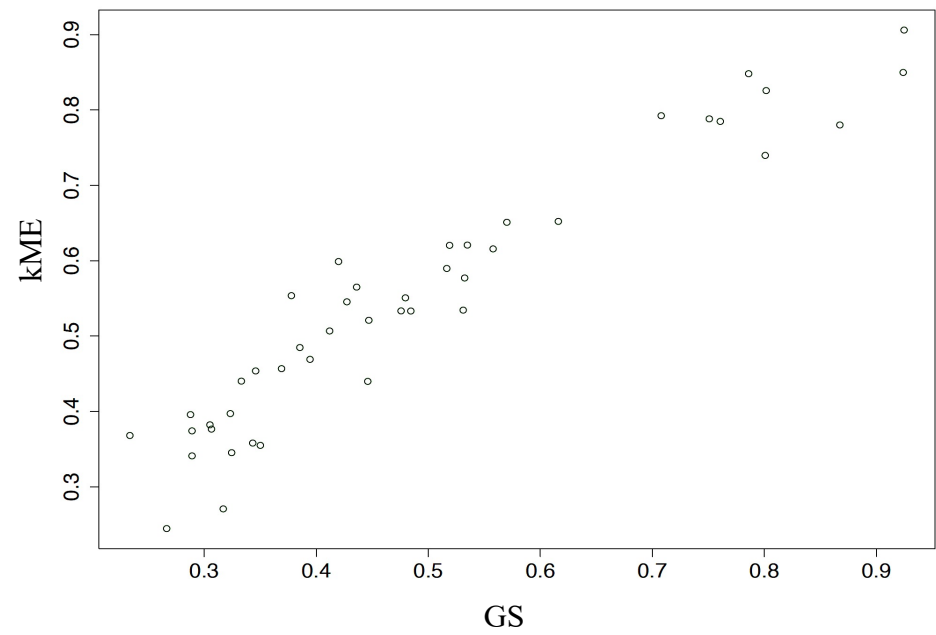

Dark red module (GTEx)

**cor=0.96, p=2.6e-34**

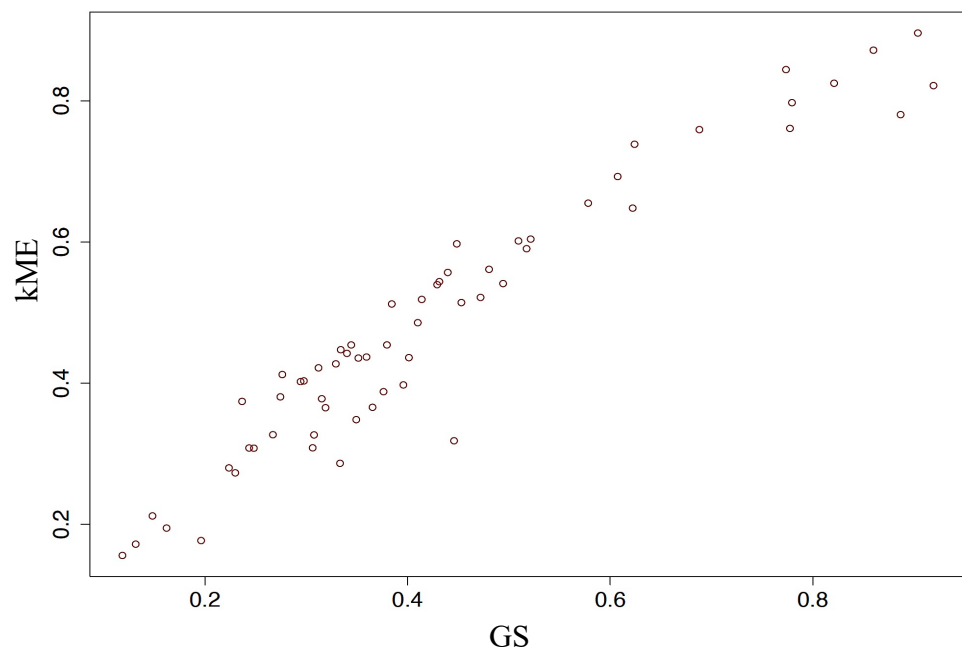

Green module (TCGA)

**cor=0.85, p=2.9e-52**

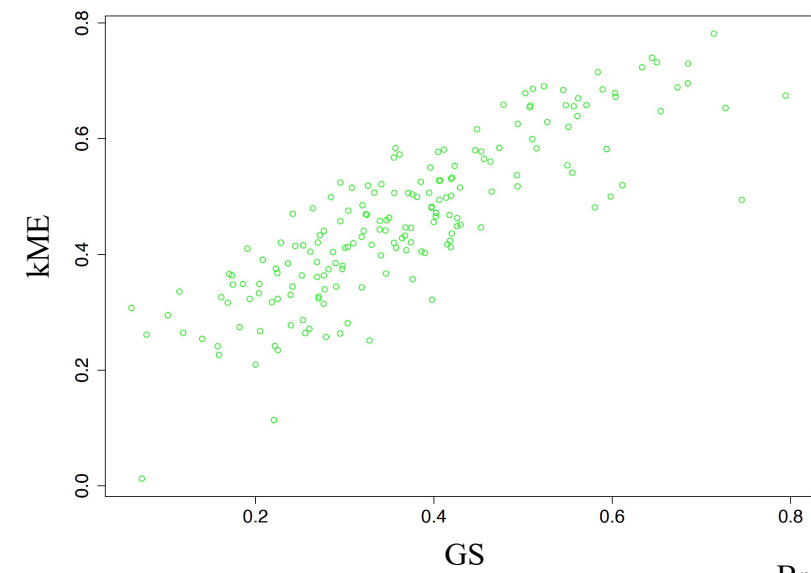

Red module (TCGA)

**cor=0.33, p=5.1e-06**

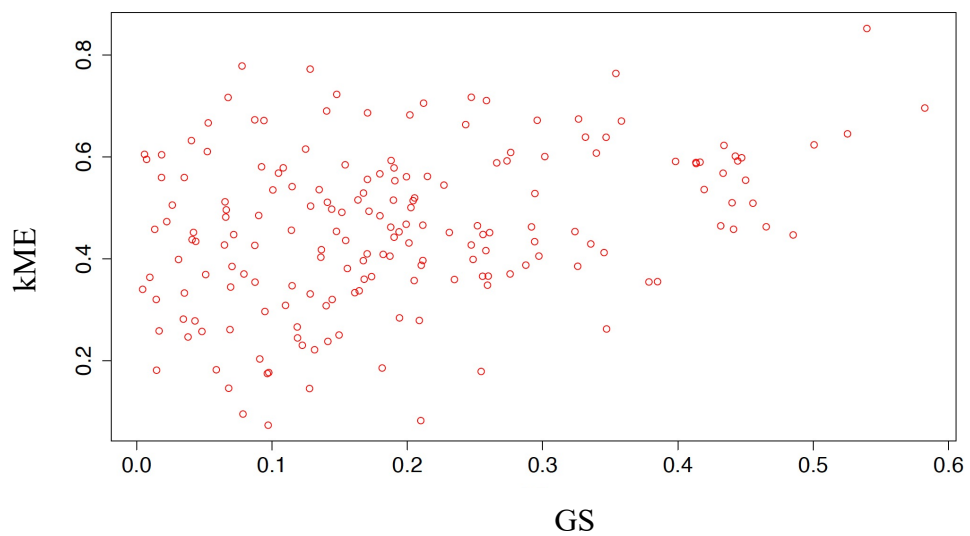

Brown module (Melanocyte cell line)

**cor=0.45, p=1.4e-13**

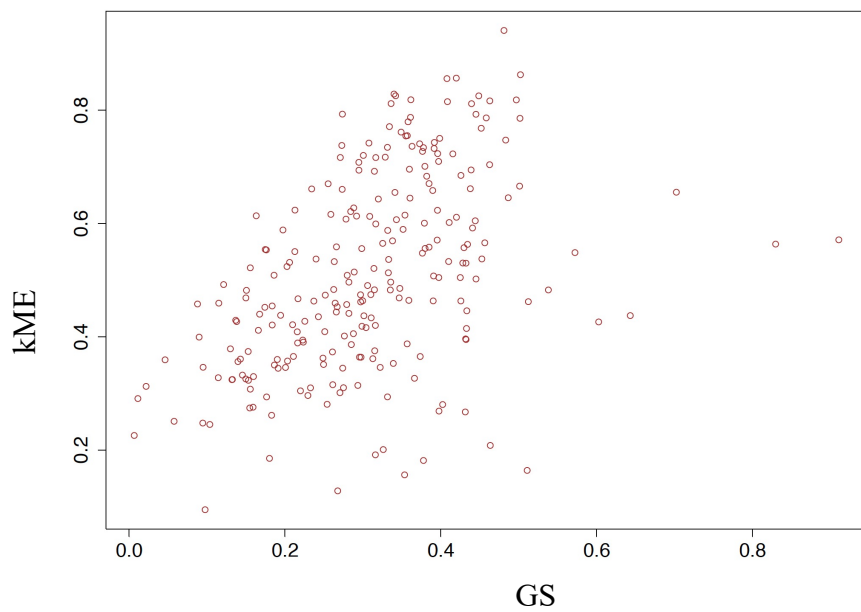

Supplement: NIHMS1781264-supplement-3.pdf [file NIHMS1781264-supplement-3.pdf]
