# Supplementary material
Source: PubMed Central journal article supplement (PMC9378750)

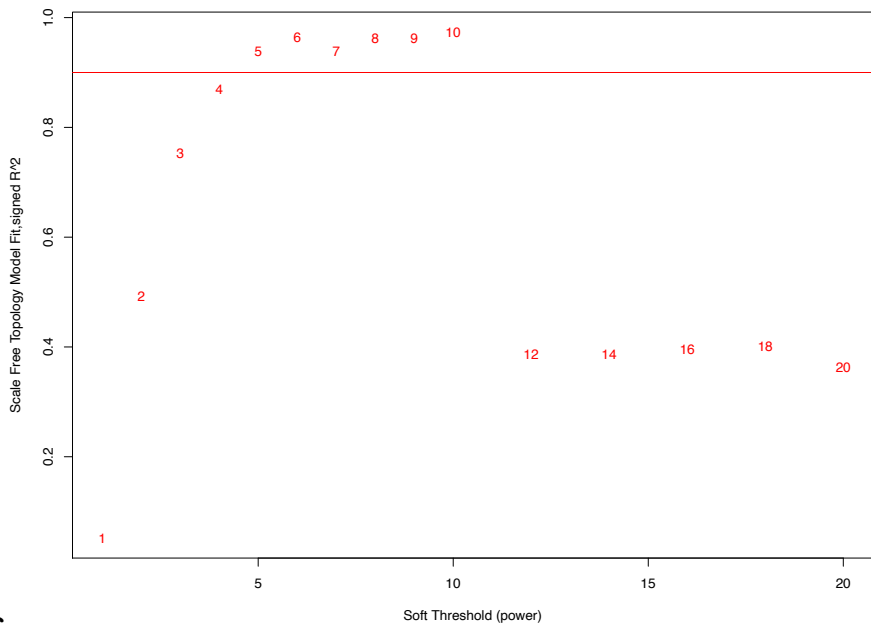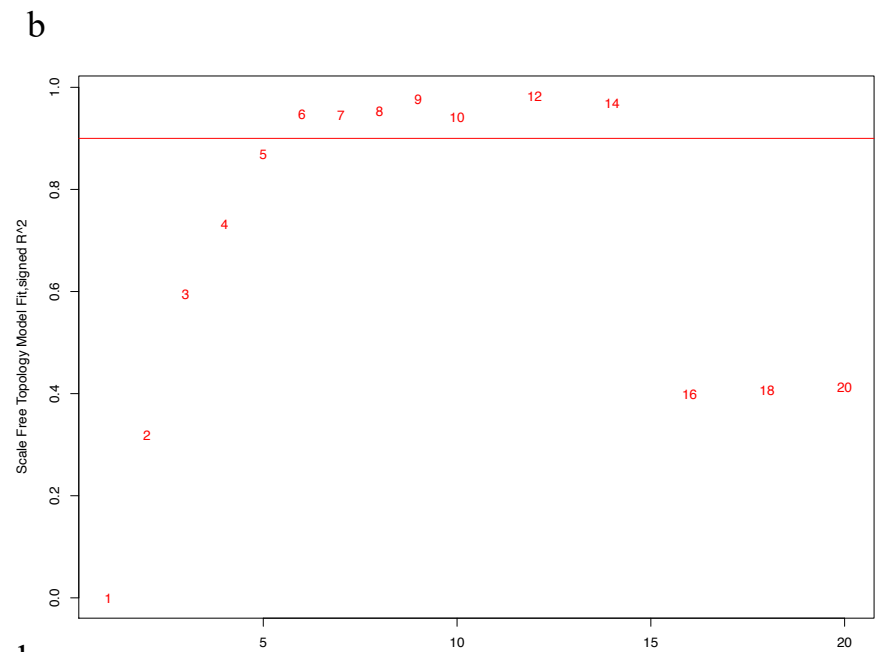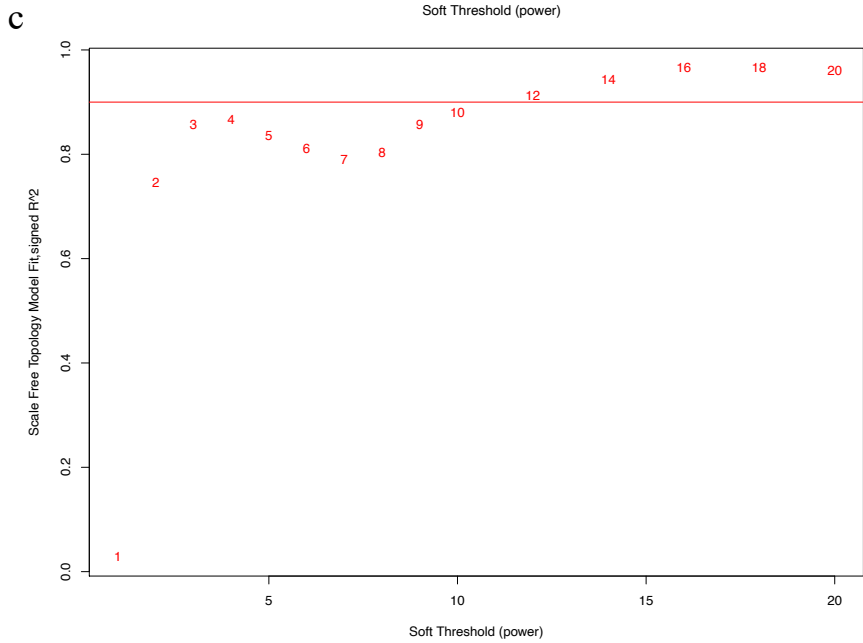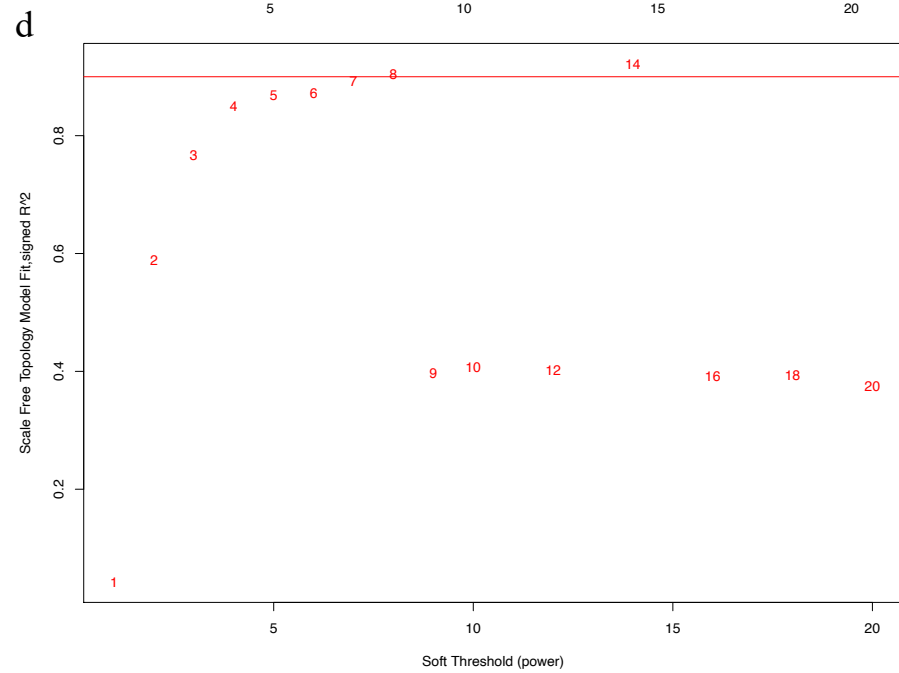

Supplement: NIHMS1781264-supplement-1.pdf [file NIHMS1781264-supplement-1.pdf]

a

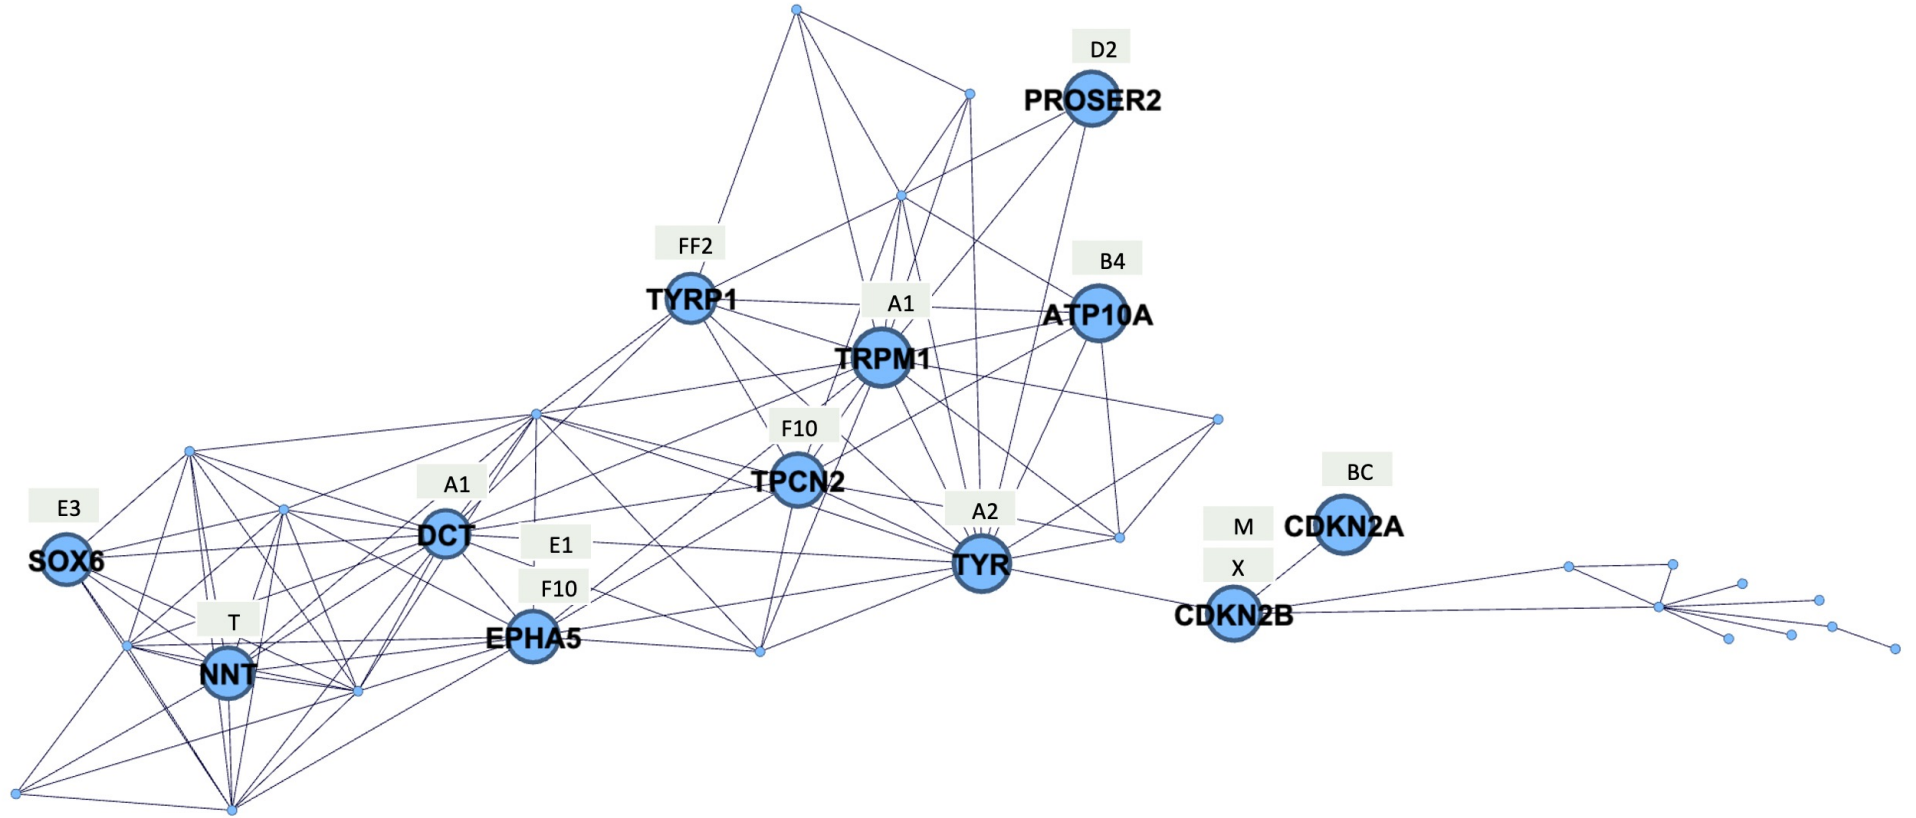

b

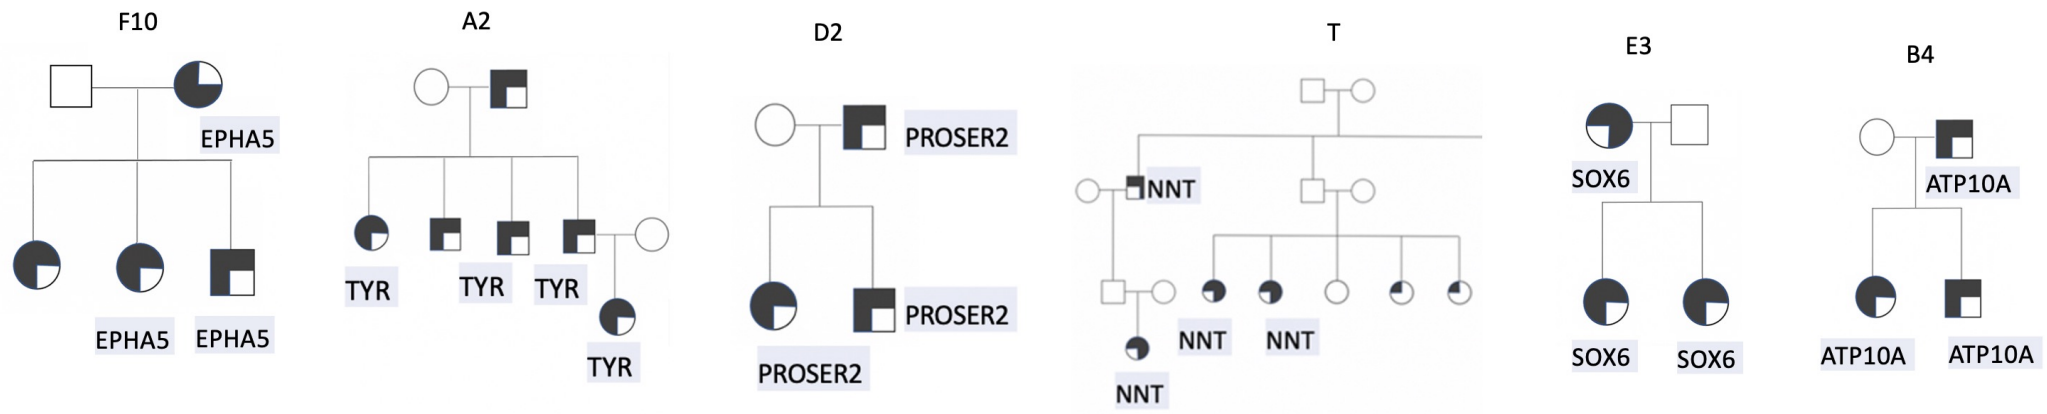

Supplement: NIHMS1781264-supplement-4.pdf [file NIHMS1781264-supplement-4.pdf]

**a** Affected Cases in TCGA-SKCM and Across the GDC

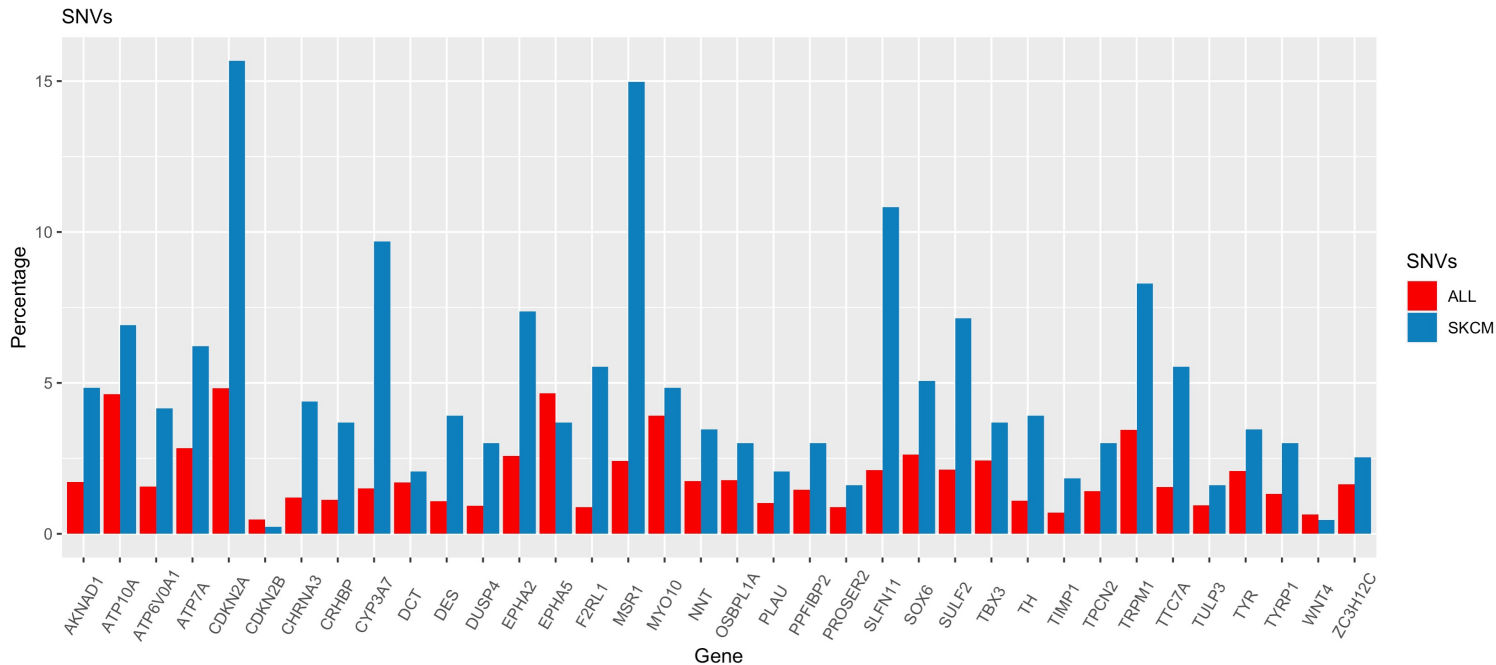

**b** Affected Cases in TCGA-SKCM

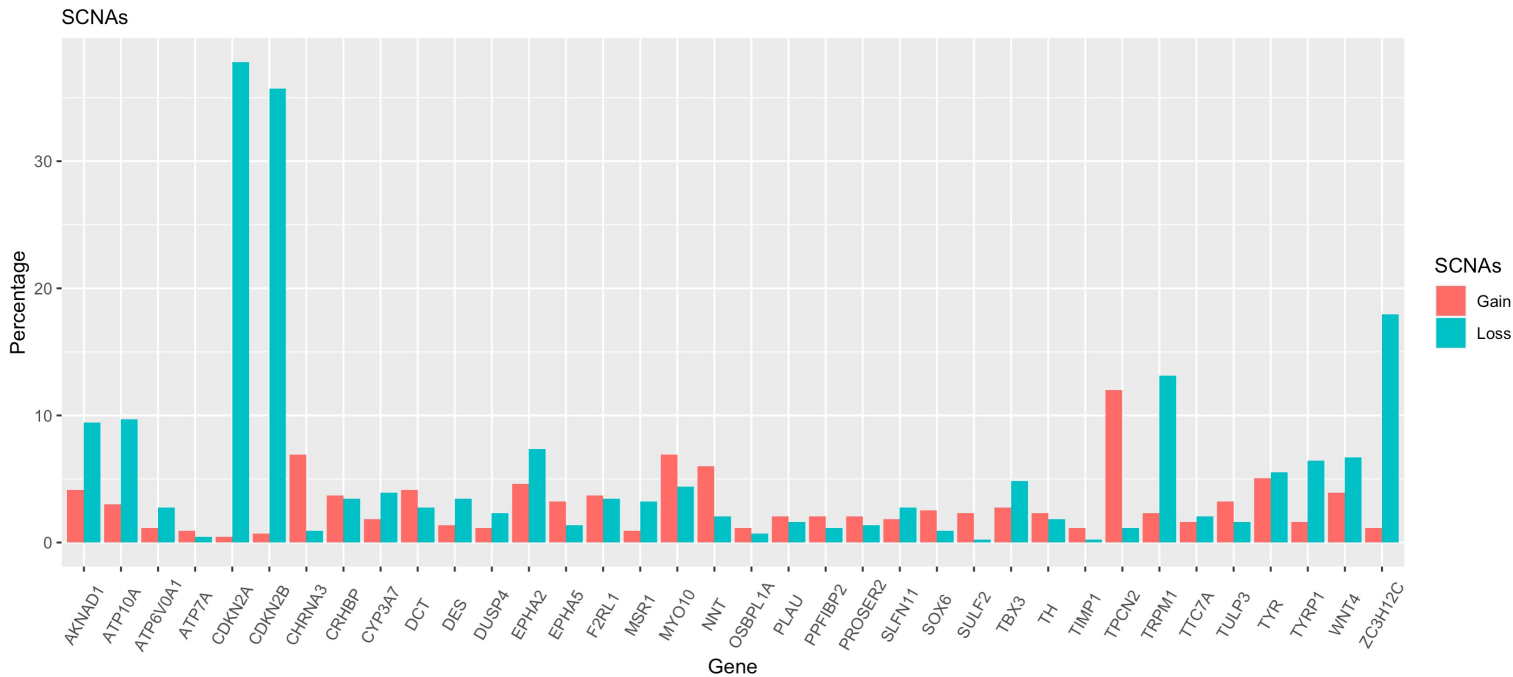

Supplement: NIHMS1781264-supplement-5.pdf [file NIHMS1781264-supplement-5.pdf]
